# Supplementary material for: Novel SiO2@MgxSiyOz composite with high-efficiency adsorption of Rhodamine B in water
Source: Royal Society of Chemistry journal article supplement (doi:10.1039/c4ra08659g), 2014-01-01
Supplement: c4ra08659g1.pdf [file c4ra08659g1.pdf]

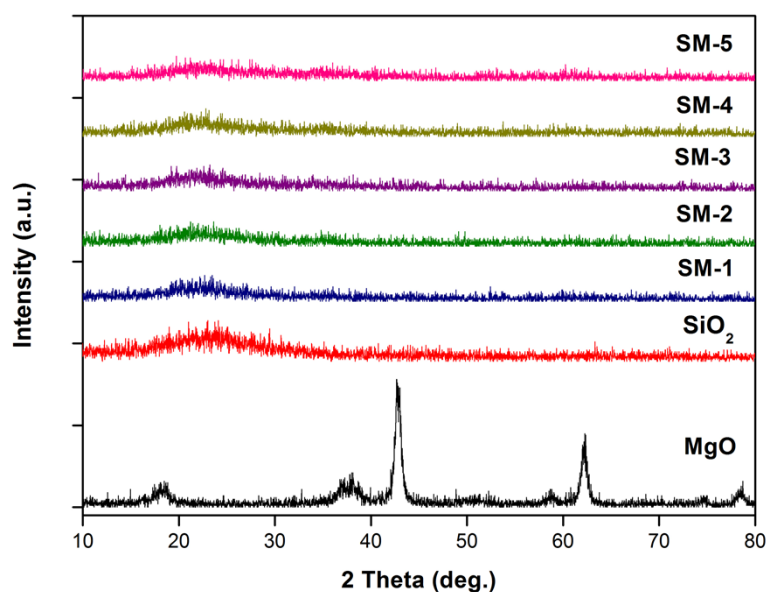

**Fig.S1** X-ray diffraction patterns of SM-1 to SM-5 with different magnesium oxide addition.

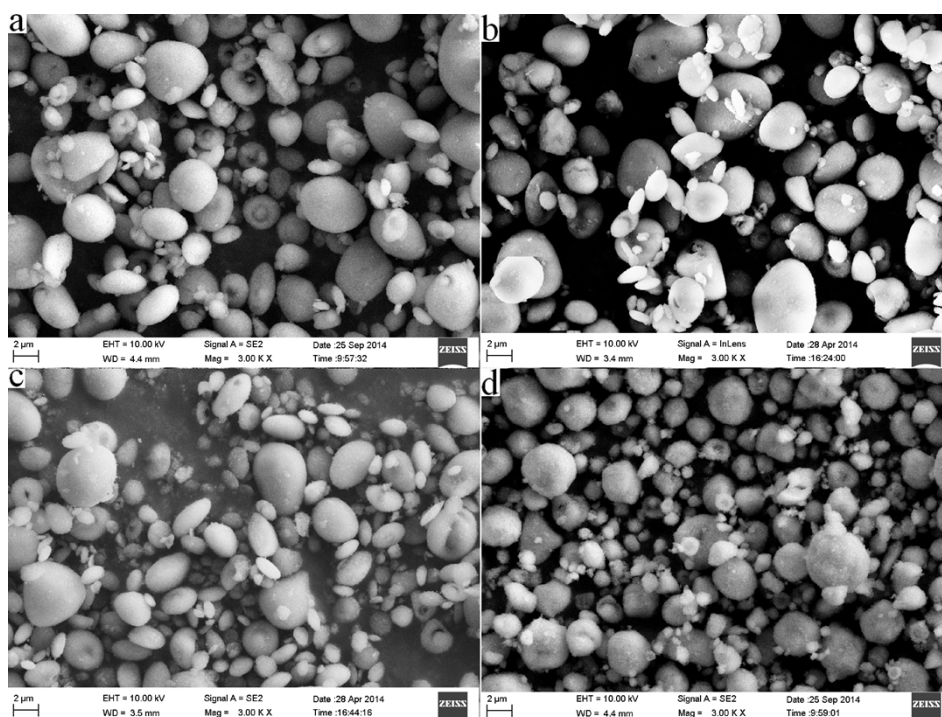

**Fig.S2** SEM images of (a) SM-1; (b) SM-2; (c) SM-3; (d) SM-4.
